# Supplementary material for: The effect of interface polarity on the basal dislocations at the GaN/AlN interface
Source: Royal Society of Chemistry journal article supplement (doi:10.1039/d4cp03069a), 2024-11-27
Supplement: d4cp03069a1.pdf [file d4cp03069a1.pdf]

## **Supporting Information**

### **The effect of interface polarity on the basal dislocations at the GaN/AlN interface**

Yuming Yang <sup>a, b</sup>, Xuemei Zhang <sup>c</sup>, Mi Qin <sup>a, b</sup>, Jun Liu <sup>a, b</sup>, Chuanguo Zhang <sup>a, b</sup>, Zhixin Hui <sup>c</sup>, Yonggang Li <sup>a, b</sup>, Zhi Zeng <sup>a, b</sup> and Yongsheng Zhang <sup>\*d</sup>

<sup>a</sup> Key Laboratory of Materials Physics, Institute of Solid State Physics, HFIPS, Chinese Academy of Sciences, Hefei 230031, China

<sup>b</sup> Science Island Branch of Graduate School, University of Science and Technology of China, Hefei 230026, China

<sup>c</sup> School of Physics and Electronic Information Engineering, Engineering Research Center of Nanostructure and Functional Materials, Ningxia Normal University, Guyuan, Ningxia, 756000, China

<sup>d</sup> Advanced Research Institute of Multidisciplinary Sciences, Qufu Normal University, Qufu, Shandong Province, 273165, China

\* Corresponding author

Email: [yshzhang@qfnu.edu.cn](mailto:yshzhang@qfnu.edu.cn)

The convergency of parameter settings in DFT calculations of GaN/AlN supercell have been tested using the interfacial energy ( $\gamma$ ):

$$\gamma = [E(\text{interface}) - (E_{\text{bulk}}(\text{GaN}) + E_{\text{bulk}}(\text{AlN}))]/S, \quad (1)$$

where  $E(\text{interface})$  is the energy of the GaN/AlN interface supercell.  $E_{\text{bulk}}(\text{GaN})$  and  $E_{\text{bulk}}(\text{AlN})$  are the energies of the bulk GaN and bulk AlN, respectively. The sizes of bulk GaN and bulk AlN are the same as the parts of GaN and AlN in the GaN/AlN interface supercell.  $S$  is the total interfacial area in the GaN/AlN interface supercell.

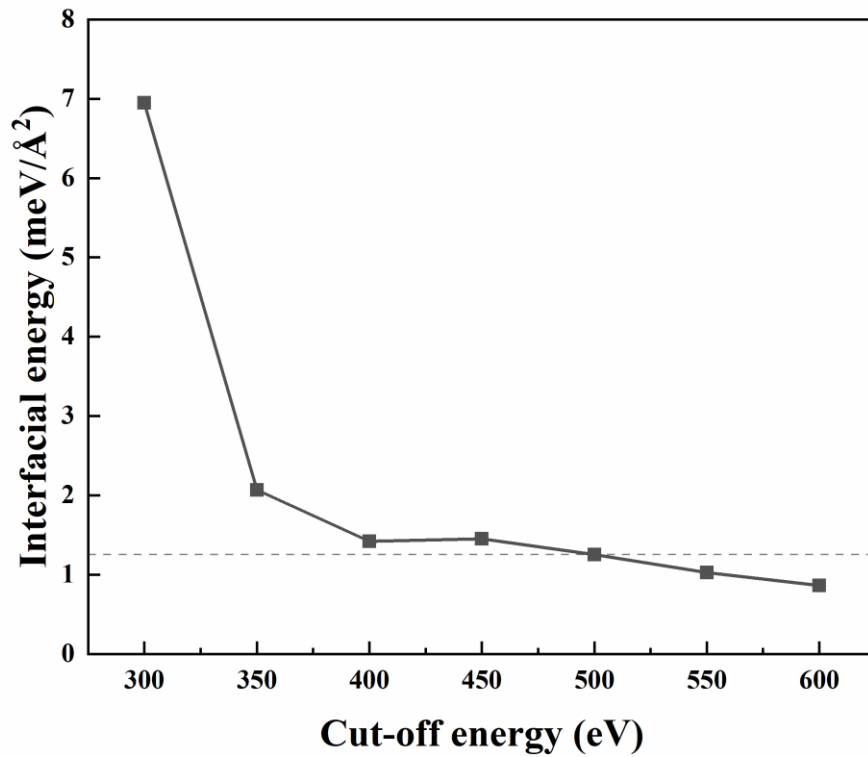

**Fig. S1** Cut-off energy converge test of GaN/AlN interface using the interfacial energy.

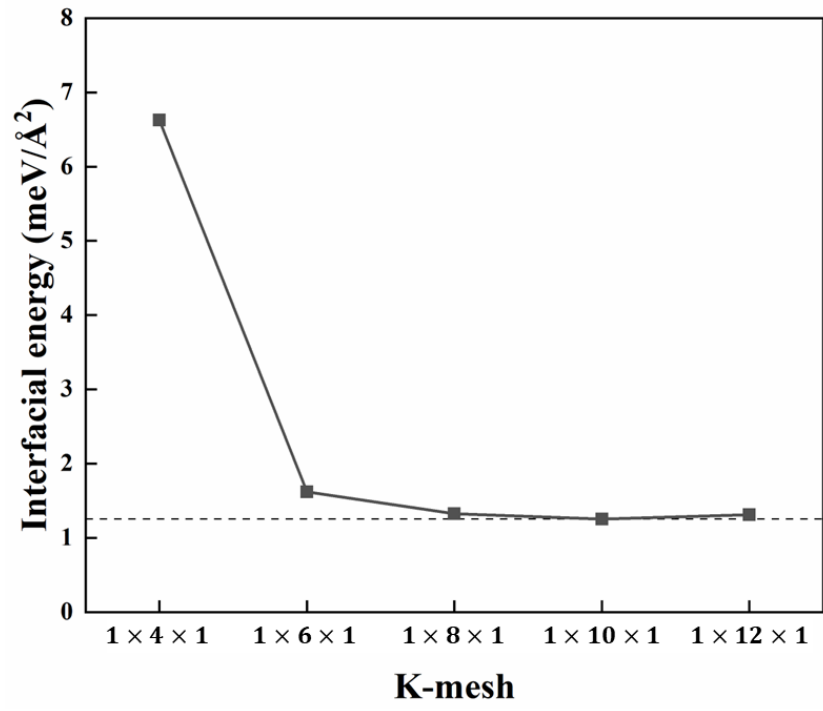

Fig. S2 K-mesh converge test of GaN/AlN interface using the interfacial energy.

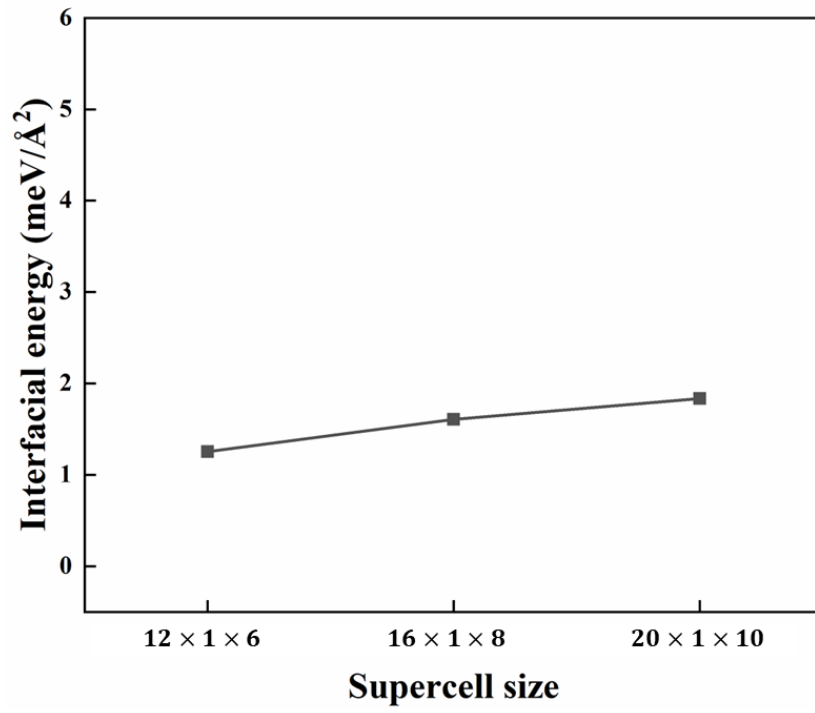

**Fig. S3** Supercell size converge test of GaN/AlN interface using the interfacial energy.

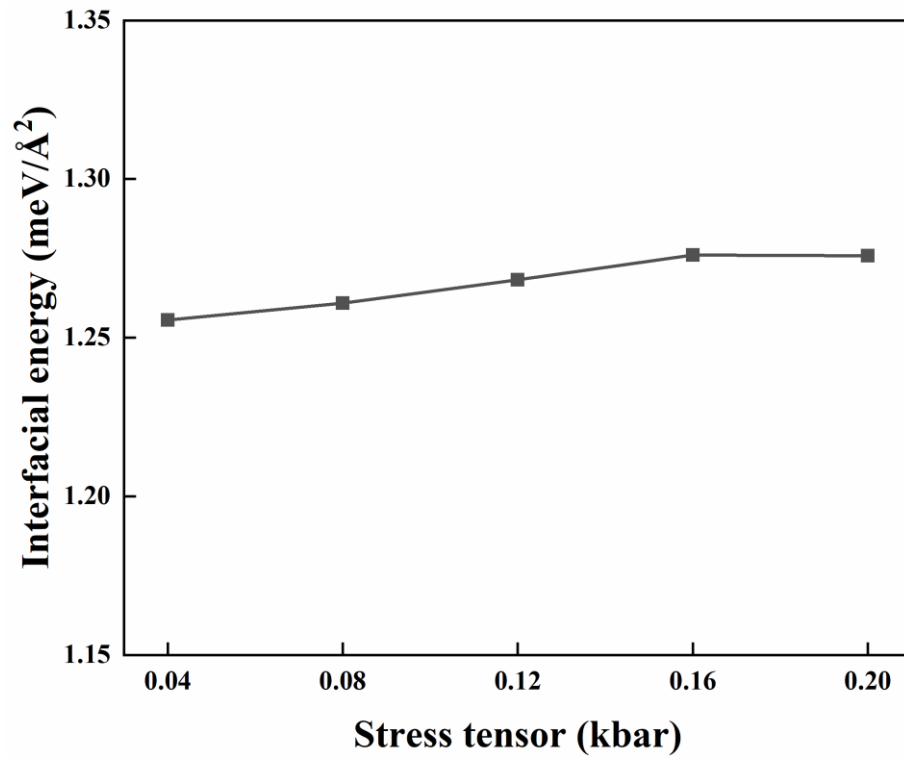

**Fig. S4** Stress tensor converge test of GaN/AlN interface using the interfacial energy.

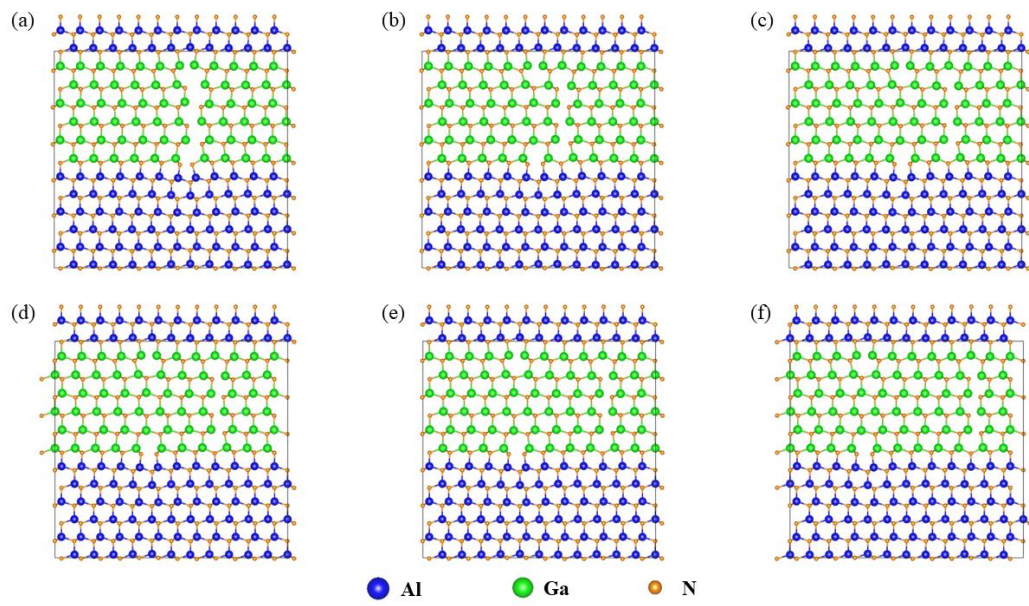

**Fig. S5** Combinations of basal dislocations (Glide-Glide) at the GaN/AlN interface after relaxation (Density functional theory calculations). Fig. a-f correspond to different initial dislocation distances  $d$ : (a)  $d = 0 \text{ \AA}$ , (b)  $d = 3.127 \text{ \AA}$ , (c)  $d = 6.254 \text{ \AA}$ , (d)  $d = 9.381 \text{ \AA}$ , (e)  $d = 12.508 \text{ \AA}$ , (f)  $d = 15.635 \text{ \AA}$ .

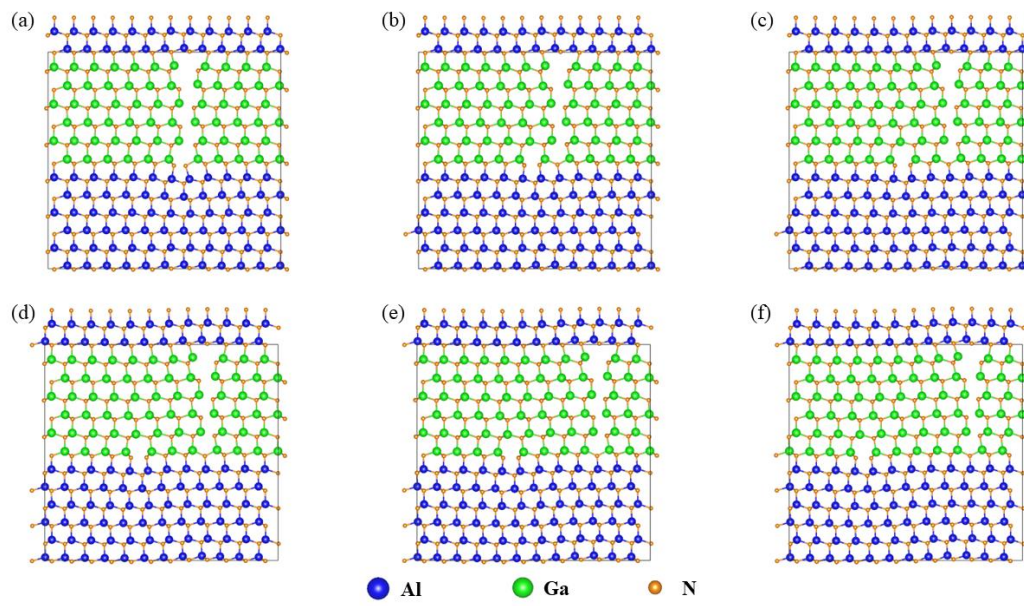

**Fig. S6** Combinations of basal dislocations (Glide-Shuffle) at the GaN/AlN interface after relaxation (Density functional theory calculations). Fig. a-f correspond to different initial dislocation distances  $d$ : (a)  $d = 0 \text{ \AA}$ , (b)  $d = 3.127 \text{ \AA}$ , (c)  $d = 6.254 \text{ \AA}$ , (d)  $d = 9.381 \text{ \AA}$ , (e)  $d = 12.508 \text{ \AA}$ , (f)  $d = 15.635 \text{ \AA}$ .

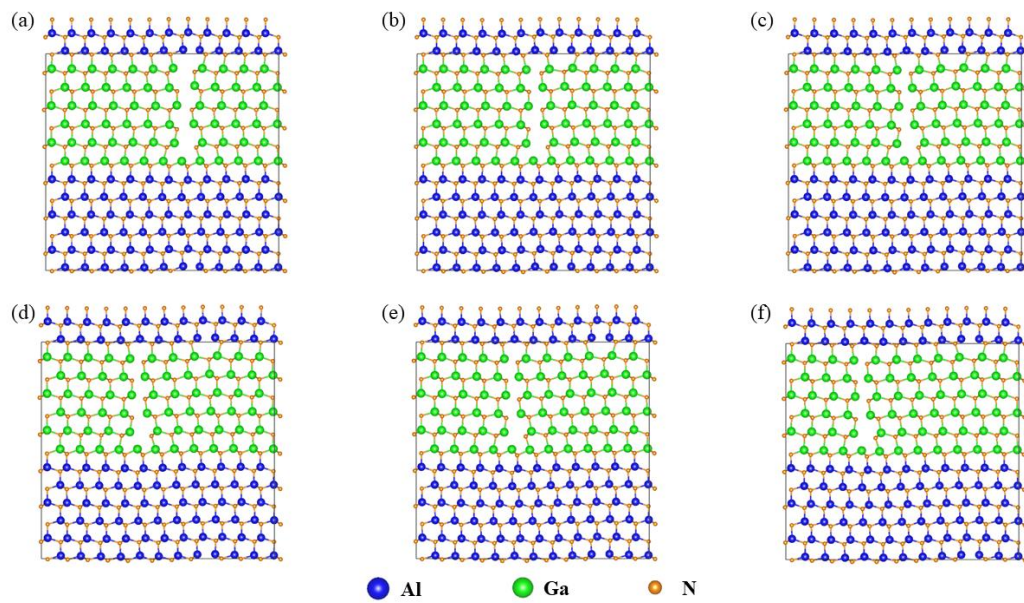

**Fig. S7** Combinations of basal dislocations (Shuffle-Glide) at the GaN/AlN interface after relaxation (Density functional theory calculations). Fig. a-f correspond to different initial dislocation distances  $d$ : (a)  $d = 0 \text{ \AA}$ , (b)  $d = 3.127 \text{ \AA}$ , (c)  $d = 6.254 \text{ \AA}$ , (d)  $d = 9.381 \text{ \AA}$ , (e)  $d = 12.508 \text{ \AA}$ , (f)  $d = 15.635 \text{ \AA}$ .



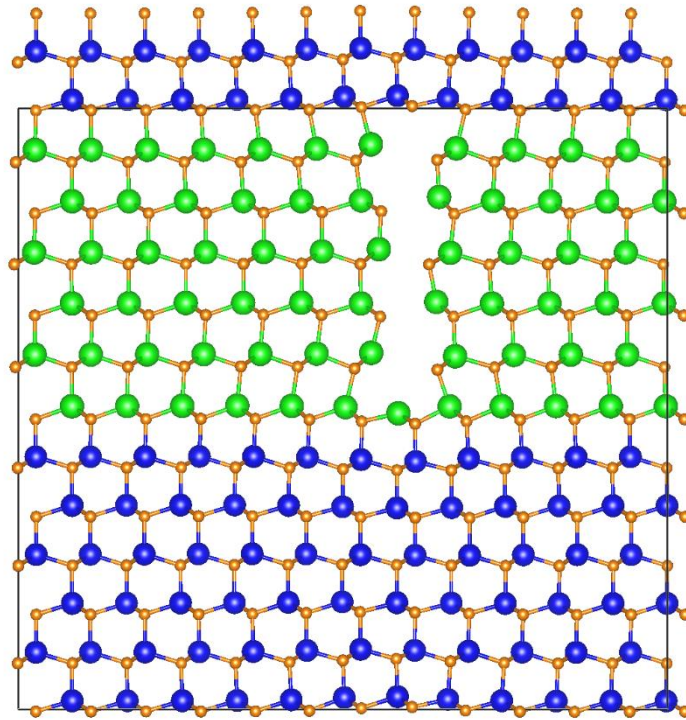

**Fig. S8** Combinations of basal dislocations (Shuffle-Shuffle) at the GaN/AlN interface after relaxation (Density functional theory calculations).

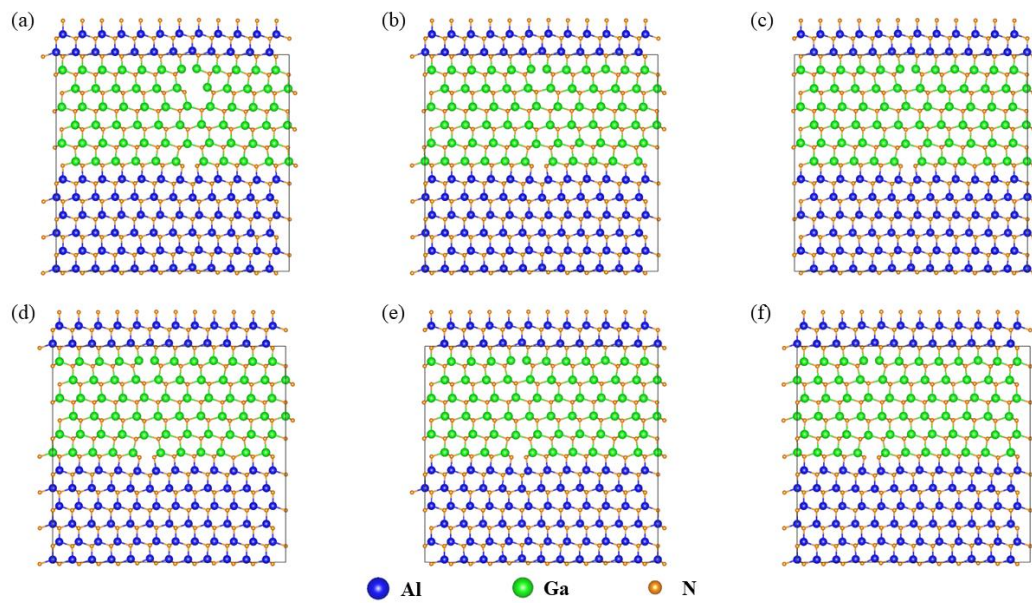

**Fig. S9** Combinations of basal dislocations (Glide-Glide) at the GaN/AlN interface after relaxation (Molecular dynamic calculations at 1300K). Fig. a-f correspond to different initial dislocation distances  $d$ : (a)  $d = 0 \text{ \AA}$ , (b)  $d = 3.127 \text{ \AA}$ , (c)  $d = 6.254 \text{ \AA}$ , (d)  $d = 9.381 \text{ \AA}$ , (e)  $d = 12.508 \text{ \AA}$ , (f)  $d = 15.635 \text{ \AA}$ .

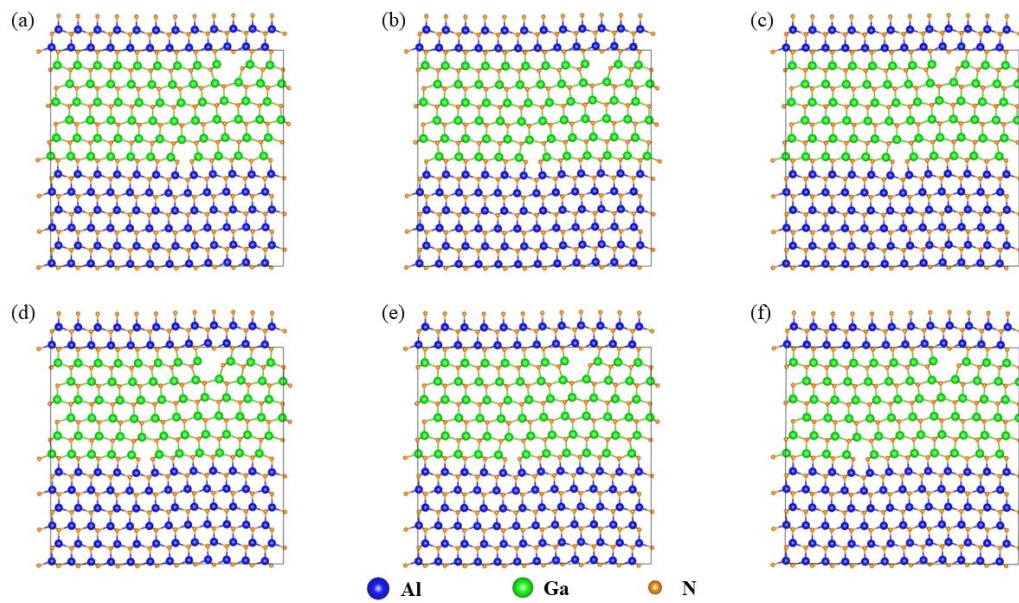

**Fig. S10** Combinations of basal dislocations (Glide-Shuffle) at the GaN/AlN interface after relaxation (Molecular dynamic calculations at 1300K). Fig. a-f correspond to different initial dislocation distances  $d$ : (a)  $d = 0 \text{ \AA}$ , (b)  $d = 3.127 \text{ \AA}$ , (c)  $d = 6.254 \text{ \AA}$ , (d)  $d = 9.381 \text{ \AA}$ , (e)  $d = 12.508 \text{ \AA}$ , (f)  $d = 15.635 \text{ \AA}$ .

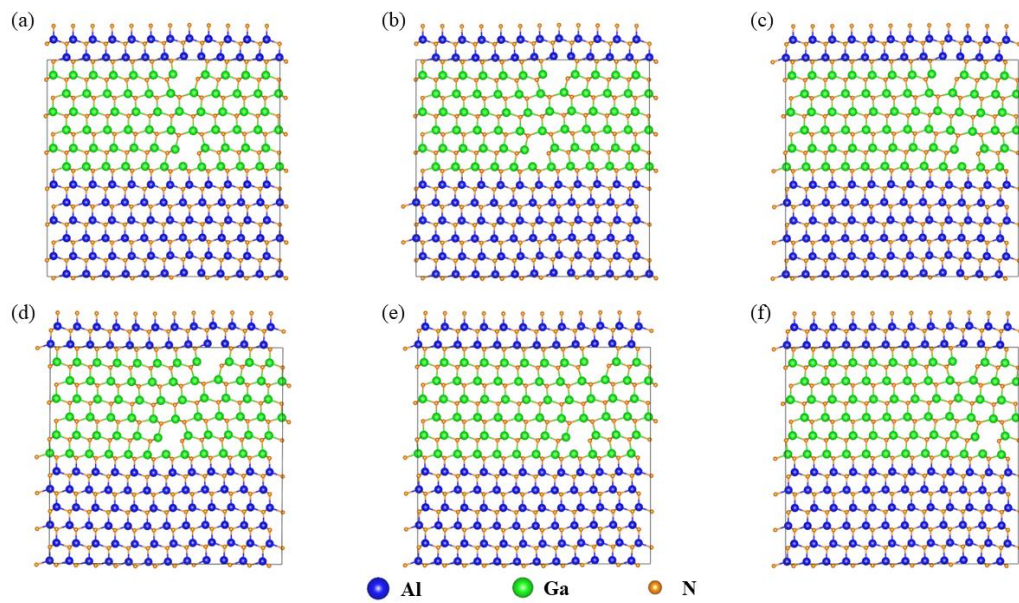

**Fig. S11** Combinations of basal dislocations (Shuffle-Glide) at the GaN/AlN interface after relaxation (Molecular dynamic calculations at 1300K). Fig. a-f correspond to different initial dislocation distances  $d$ : (a)  $d = 0 \text{ \AA}$ , (b)  $d = 3.127 \text{ \AA}$ , (c)  $d = 6.254 \text{ \AA}$ , (d)  $d = 9.381 \text{ \AA}$ , (e)  $d = 12.508 \text{ \AA}$ , (f)  $d = 15.635 \text{ \AA}$ .

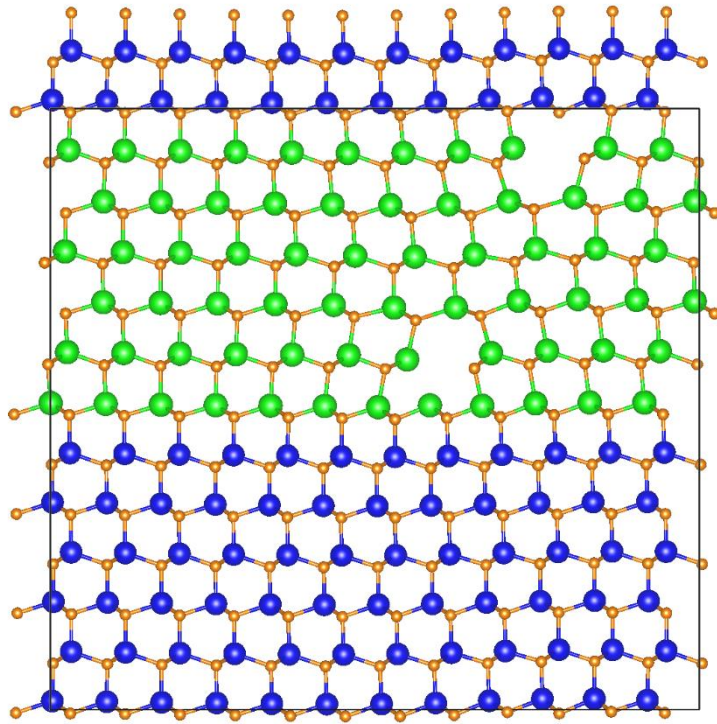

**Fig. S12** Combinations of basal dislocations (Shuffle-Shuffle) at the GaN/AlN interface after relaxation (Molecular dynamic calculations at 1300K).

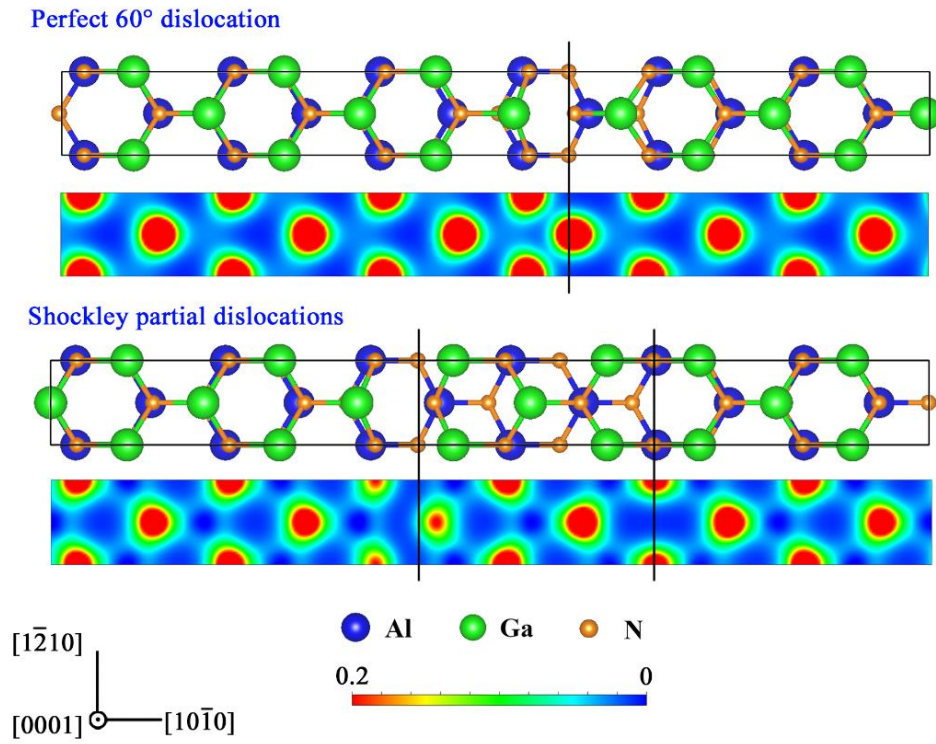

**Fig. S13** The structure and charge density of different dislocations at Al polar GaN/AlN interfaces on the (0001) plane. The black lines along  $[1\bar{2}10]$  correspond to the dislocation lines of different dislocations.

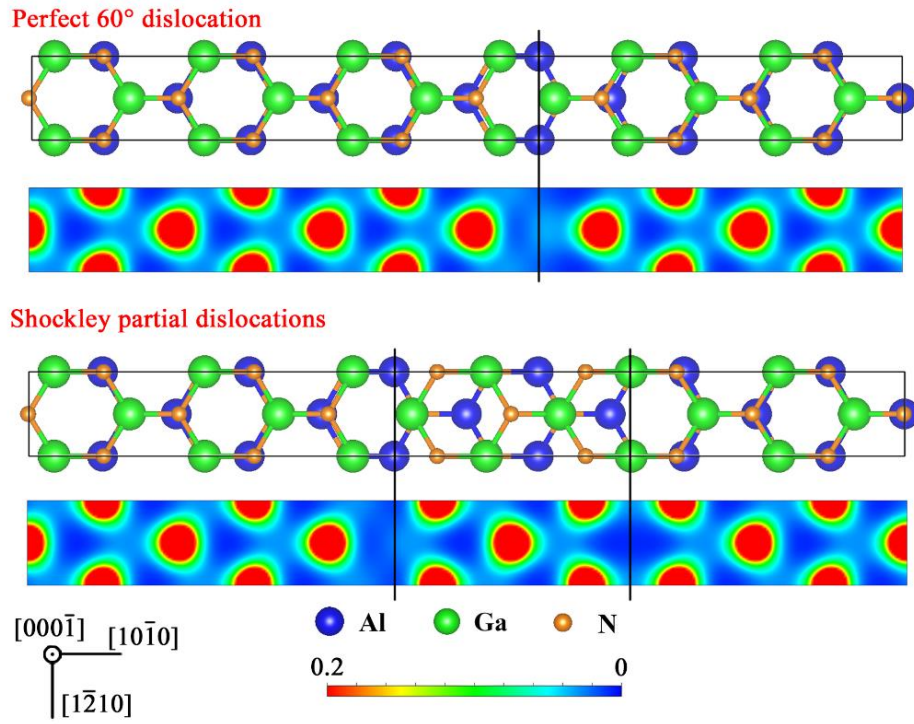

**Fig. S14** The structure and charge density of different dislocations at N polar GaN/AlN interfaces on the  $(000\bar{1})$  plane. The black lines along  $[1\bar{2}10]$  correspond to the dislocation lines of different dislocations.
